# Supplementary material
Source: Springer Nature journal article supplement (https://www.springermedizin.de/resource/supplementary/12876_2013_992_MOESM1_ESM.pdf/9437872)

**a**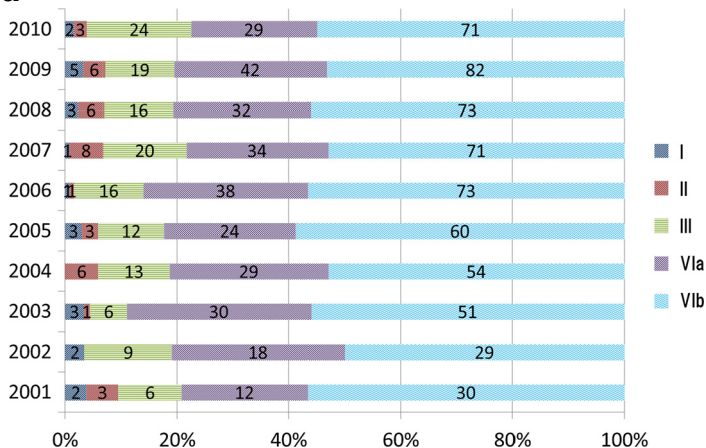**b**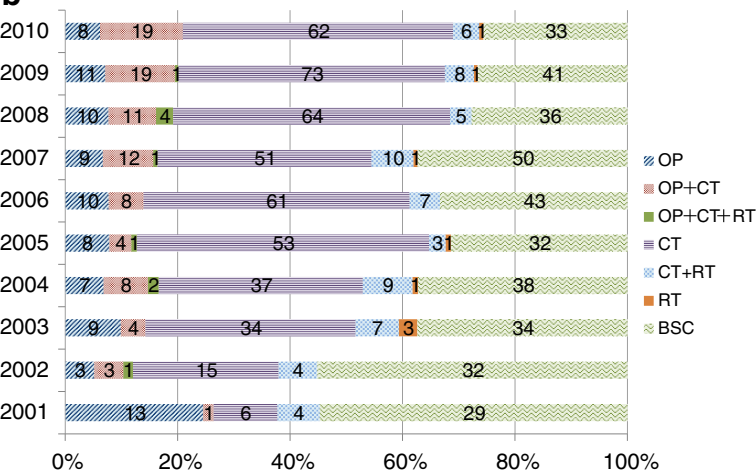

Supplement: MOESM1 [file 9437872]
